# Supplementary material for: Proteomic Analysis of Preoperative CSF Reveals Risk Biomarkers of Postoperative Delirium
Source: Front Psychiatry. 2020 Mar 4;11:170. doi: 10.3389/fpsyt.2020.00170 (PMC7064445; doi:10.3389/fpsyt.2020.00170)
Supplement: Supplementary file 1 [file Table_1.DOCX]

**Table S1. Dysregulated proteins revealed by untargeted proteomics.**

| Protein ID | Fold change (POD/No-POD) | *P* Value |
| --- | --- | --- |
| sp|Q5BLP8|CD048_HUMAN | 0.525188157 | 0.0129285 |
| sp|Q8TAG5|VTM2A_HUMAN | 0.552590618 | 0.0380422 |
| sp|A6NLU5|VTM2B_HUMAN | 0.558393256 | 0.0318223 |
| sp|Q8IUK5|PLDX1_HUMAN | 0.561563349 | 0.0211786 |
| sp|P48058|GRIA4_HUMAN | 0.573578535 | 0.0099322 |
| sp|P32004|L1CAM_HUMAN | 0.579262871 | 0.0176409 |
| sp|Q06828|FMOD_HUMAN | 0.62322109 | 0.030122 |
| sp|Q02487|DSC2_HUMAN | 0.640778561 | 0.0175197 |
| sp|Q6MZW2|FSTL4_HUMAN | 0.642185658 | 0.0308302 |
| sp|P07711|CATL1_HUMAN | 0.657097266 | 0.0007754 |
| sp|P52799|EFNB2_HUMAN | 0.669219528 | 0.0233388 |
| sp|Q6NW40|RGMB_HUMAN | 0.670039775 | 0.0224965 |
| sp|O95967|FBLN4_HUMAN | 0.68471393 | 0.0394013 |
| sp|Q8WZA1|PMGT1_HUMAN | 0.692540684 | 0.0041811 |
| sp|Q24JP5|T132A_HUMAN | 0.696427758 | 0.0191645 |
| sp|P23284|PPIB_HUMAN | 0.704945059 | 0.0100657 |
| sp|Q9Y5Y7|LYVE1_HUMAN | 0.706014726 | 0.0301129 |
| sp|O95502|NPTXR_HUMAN | 0.716105332 | 0.0473163 |
| sp|P22105|TENX_HUMAN | 0.719854431 | 0.0243064 |
| sp|P23470|PTPRG_HUMAN | 0.720563434 | 0.0256475 |
| sp|Q6UXD5|SE6L2_HUMAN | 0.721271666 | 0.0190466 |
| sp|Q7Z3B1|NEGR1_HUMAN | 0.72304904 | 0.0281246 |
| sp|Q15904|VAS1_HUMAN | 0.724069893 | 0.0118521 |
| sp|Q9Y4C0|NRX3A_HUMAN | 0.727398094 | 0.0172686 |
| sp|Q14982|OPCM_HUMAN | 0.730757688 | 0.026178 |
| sp|Q9UBQ6|EXTL2_HUMAN | 0.731156853 | 0.0108952 |
| sp|Q9BY67|CADM1_HUMAN | 0.731809747 | 0.0172612 |
| sp|O75144|ICOSL_HUMAN | 0.733194642 | 0.0212364 |
| sp|Q9H3G5|CPVL_HUMAN | 0.734279851 | 0.0209928 |
| sp|O43505|B4GA1_HUMAN | 0.735134997 | 0.0117822 |
| sp|Q99574|NEUS_HUMAN | 0.742096595 | 0.0455491 |
| sp|O75326|SEM7A_HUMAN | 0.74334133 | 0.0411907 |
| sp|P49641|MA2A2_HUMAN | 0.746036692 | 0.0228003 |
| sp|P12259|FA5_HUMAN | 0.750377347 | 0.0074559 |
| sp|P33908|MA1A1_HUMAN | 0.751074198 | 0.0365002 |
| sp|P36222|CH3L1_HUMAN | 0.751932565 | 0.0193597 |
| sp|P07686|HEXB_HUMAN | 0.752386382 | 0.0153197 |
| sp|P23471|PTPRZ_HUMAN | 0.755306035 | 0.0146818 |
| sp|P43251|BTD_HUMAN | 0.758254861 | 0.0024663 |
| sp|P05154|IPSP_HUMAN | 0.764390003 | 0.0200905 |
| sp|Q13332|PTPRS_HUMAN | 0.771624843 | 0.0180858 |
| sp|P26992|CNTFR_HUMAN | 0.772774907 | 0.0398741 |
| sp|P19021|AMD_HUMAN | 0.773400056 | 0.0311183 |
| sp|Q9P121|NTRI_HUMAN | 0.777165712 | 0.0354655 |
| sp|P16870|CBPE_HUMAN | 0.777413485 | 0.0394 |
| sp|Q14515|SPRL1_HUMAN | 0.779929723 | 0.00805 |
| sp|P13521|SCG2_HUMAN | 0.780583466 | 0.0402299 |
| sp|P20062|TCO2_HUMAN | 0.780872973 | 0.0462374 |
| sp|Q9BTY2|FUCO2_HUMAN | 0.791548673 | 0.034448 |
| sp|Q6UX73|CP089_HUMAN | 0.79160734 | 0.0262792 |
| sp|P11021|BIP_HUMAN | 0.792299978 | 0.0064205 |
| sp|Q96KN2|CNDP1_HUMAN | 0.795796946 | 0.0360522 |
| sp|O00391|QSOX1_HUMAN | 0.79957704 | 0.0093825 |
| sp|P49908|SEPP1_HUMAN | 0.804159789 | 0.0233985 |
| sp|Q6UX71|PXDC2_HUMAN | 0.815847872 | 0.0354194 |
| sp|P27797|CALR_HUMAN | 0.820135986 | 0.0123648 |
| sp|Q12860|CNTN1_HUMAN | 0.822361147 | 0.0326568 |
| sp|P41222|PTGDS_HUMAN | 0.887585392 | 0.0351564 |
| sp|P01857|IGHG1_HUMAN | 1.370887154 | 0.0415034 |
| sp|P00558|PGK1_HUMAN | 2.034815028 | 0.0292314 |
| sp|P23528|COF1_HUMAN | 2.543209896 | 0.0384416 |
| sp|P00915|CAH1_HUMAN | 5.17676762 | 0.0409388 |
| sp|P02042|HBD_HUMAN | 6.033869257 | 0.0277123 |
